# Supplementary material
Source: PubMed Central journal article supplement (PMC1383530)
Supplement: 7600946s1.pdf [file 7600946s1.pdf]

**Supplementary Table I.** Yeast strains used.

| Name                            | Genotype                                                                                        |
|---------------------------------|-------------------------------------------------------------------------------------------------|
| MHY495 <sup>a</sup>             | $\alpha$ <i>his3-Δ200 leu2-3,112 ura3-52 lys2-801 trp1-1 ubc6Δ::HIS3</i>                        |
| MHY498 <sup>a</sup>             | $\alpha$ <i>his3-Δ200 leu2-3,112 ura3-52 lys2-801 trp1-1 ubc4Δ::HIS3</i>                        |
| MHY500 <sup>a</sup>             | <b>a</b> <i>his3-Δ200 leu2-3,112 ura3-52 lys2-801 trp1-1</i>                                    |
| MHY501 <sup>a</sup>             | $\alpha$ <i>his3-Δ200 leu2-3,112 ura3-52 lys2-801 trp1-1</i>                                    |
| MHY1364 (YTX105) <sup>b</sup>   | $\alpha$ <i>his3-Δ200 leu2-3,112 ura3-52 lys2-801 trp1-1 cue1Δ::HIS3</i>                        |
| MHY1631 <sup>c</sup>            | $\alpha$ <i>his3-Δ200 leu2-3,112 ura3-52 lys2-801 trp1-1 doa10Δ::HIS3</i>                       |
| MHY1669 (RHY1952) <sup>d</sup>  | $\alpha$ <i>his3-Δ200 leu2-3,112 ura3-52 lys2-801 trp1-1 hrd1Δ::LEU2</i>                        |
| MHY1687                         | $\alpha$ <i>his3-Δ200 leu2-3,112 ura3-52 lys2-801 trp1-1 cue1Δ::HIS3 ubc4Δ::HIS3</i>            |
| MHY1703 <sup>c</sup>            | $\alpha$ <i>his3-Δ200 leu2-3,112 ura3-52 lys2-801 trp1-1 doa10Δ::HIS3 hrd1Δ::LEU2</i>           |
| MHY1824 (SMY12-3d) <sup>e</sup> | <b>a</b> <i>his3-Δ200 leu2-Δ1 ura3-52 ade2-Δ426 lys2-801 mps2-1</i>                             |
| MHY1825 (SMY12-6a) <sup>e</sup> | <b>a</b> <i>his3-Δ200 leu2-Δ1 ura3-52 ade2-Δ426 lys2-801</i>                                    |
| MHY2482 (Y0650) <sup>f</sup>    | $\alpha$ <i>his3-Δ200 leu2-3,112 ura3-52 lys2-801 trp1-1 cdc48-6</i>                            |
| MHY2483 (Y0801) <sup>f</sup>    | $\alpha$ <i>his3-Δ200 leu2-3,112 ura3-52 lys2-801 trp1-1 npl4-1</i>                             |
| MHY3011                         | $\alpha$ <i>his3Δ1 leu2Δ0::pRS305-Deg1-URA3-3HA ura3Δ0 met15Δ0 lyp1Δ<br/>can1Δ::MFA1pr-HIS3</i> |
| MHY3185                         | <b>a</b> <i>his3-Δ200 leu2-Δ1 ura3-52 ade2-Δ426 lys2-801 mps2-1 doa10Δ::HIS3</i>                |
| MHY3187 (CUY29) <sup>g</sup>    | <b>a</b> <i>his3-Δ200 leu2-3,112 ura3-52 lys2-801</i>                                           |
| MHY3188 (CUY412) <sup>g</sup>   | $\alpha$ <i>ade2-101 leu2-3,112 ura3-52 ndc10-2</i>                                             |
| MHY3189 (CUY1053) <sup>g</sup>  | <b>a</b> <i>his3-Δ200 leu2-3,112 ura3-52 ndc10-2 kis3-66</i>                                    |
| MHY3190 (CUY1054) <sup>g</sup>  | <b>a</b> <i>his3-Δ200 leu2-3,112 ura3-52 ade2-101 ndc10-2 kis4-14</i>                           |
| MHY3272                         | $\alpha$ <i>his3 leu2 ura3 lys2-801 ndc10-2 cue1Δ::kanMX</i>                                    |
| MHY3273                         | $\alpha$ <i>his3-Δ200 leu2-3,112 ura3-52 ndc10-2 doa10Δ::HIS3</i>                               |
| MHY3512 (SM4783) <sup>h</sup>   | <b>a</b> <i>his3 leu2-3,112 ura3-52 trp1 ade2-1 cdc48-3</i>                                     |
| MHY3528                         | $\alpha$ <i>his3-Δ200 leu2-3,112 ura3-52 lys2-801 trp1-1 ade1-100 ufd1-1</i>                    |
| MHY3566 <sup>f</sup>            | <b>a</b> <i>his3-Δ200 leu2-3,112 ura3-52 lys2-801 trp1-1 ufd1-2</i>                             |

<sup>a</sup>Chen et al., 1993; <sup>b</sup>Biederer et al., 1997; <sup>c</sup>Swanson et al., 2001; <sup>d</sup>Bays et al., 2001; <sup>e</sup>McBratney and Winey, 2002; <sup>f</sup>Braun et al., 2002; <sup>g</sup>Kopski and Huffaker, 1997; <sup>h</sup>Huyer et al., 2004

## References for strains

- Bays, N.W., Gardner, R.G., Seelig, L.P., Joazeiro, C.A. and Hampton, R.Y. (2001) Hrd1p/Der3p is a membrane-anchored ubiquitin ligase required for ER- associated degradation. *Nat Cell Biol*, **3**, 24-29.
- Biederer, T., Volkwein, C. and Sommer, T. (1997) Role of Cue1p in ubiquitination and degradation at the ER surface. *Science*, **278**, 1806-1809.
- Braun, S., Matuschewski, K., Rape, M., Thoms, S. and Jentsch, S. (2002) Role of the ubiquitin-selective CDC48(UFD1/NPL4 )chaperone (segregase) in ERAD of OLE1 and other substrates. *EMBO J*, **21**, 615-621.
- Chen, P., Johnson, P., Sommer, T., Jentsch, S. and Hochstrasser, M. (1993) Multiple ubiquitin-conjugating enzymes participate in the in vivo degradation of the yeast MAT $\alpha$ 2 repressor. *Cell*, **74**, 357-369.
- Huyer, G., Piluek, W.F., Fansler, Z., Kreft, S.G., Hochstrasser, M., Brodsky, J.L. and Michaelis, S. (2004) Distinct machinery is required in *Saccharomyces cerevisiae* for the endoplasmic reticulum-associated degradation of a multispinning membrane protein and a soluble luminal protein. *J Biol Chem*, **279**, 38369-38378.
- Kopski, K.M. and Huffaker, T.C. (1997) Suppressors of the *ndc10-2* mutation: a role for the ubiquitin system in *Saccharomyces cerevisiae* kinetochore function. *Genet*, **147**, 409-420.
- McBratney, S. and Winey, M. (2002) Mutant membrane protein of the budding yeast spindle pole body is targeted to the endoplasmic reticulum degradation pathway. *Genet*, **162**, 567-578.
- Swanson, R., Locher, M. and Hochstrasser, M. (2001) A conserved ubiquitin ligase of the nuclear envelope/endoplasmic reticulum that functions in both ER-associated and Matalpha2 repressor degradation. *Genes Dev*, **15**, 2660-2674.
