# Supplementary material
Source: PubMed Central journal article supplement (PMC1383530)
Supplement: 7600946s2.pdf [file 7600946s2.pdf]

**Supplementary Table II. Steps in screen for *Deg1*-Ura3-HA3 stabilizing mutants.**

| <b>Step</b>                 | <b>Media</b>                        | <b>Time<br/>(days)</b> | <b>Temp<br/>(°C)</b> |
|-----------------------------|-------------------------------------|------------------------|----------------------|
| Mating                      | YPD                                 | 1                      | 22                   |
| Diploid selection           | SD-Leu +G418*                       | 2                      | 30                   |
| Sporulation                 | SPO**                               | 5                      | 22                   |
| MATa selection              | SD-His-Arg-Lys; CAN***; SAEC****    | 2                      | 30                   |
| G418 <sup>R</sup> selection | SD-His-Arg-Lys; CAN; SAEC; G418     | 1                      | 30                   |
| Reporter selection          | SD-His-Arg-Lys-Leu; CAN; SAEC; G418 | 2                      | 30                   |
| Ura- selection              | SD-Ura                              | 7                      | 30                   |

\* G418: Geneticin, 0.3mg/ml

\*\* SPO: 1% KAc; 0.1% yeast extract; 0.05% glucose with Ura, His, Leu additions

\*\*\* CAN: Canavanine, 50µg/ml; selects for *can1Δ::MFA1pr-HIS3*

\*\*\*\* SAEC: S-β-aminoethylcysteine, 50µg/ml; selects for *lyp1Δ* haploid cells.
