# Supplementary material
Source: PubMed Central journal article supplement (PMC1383530)

**A**

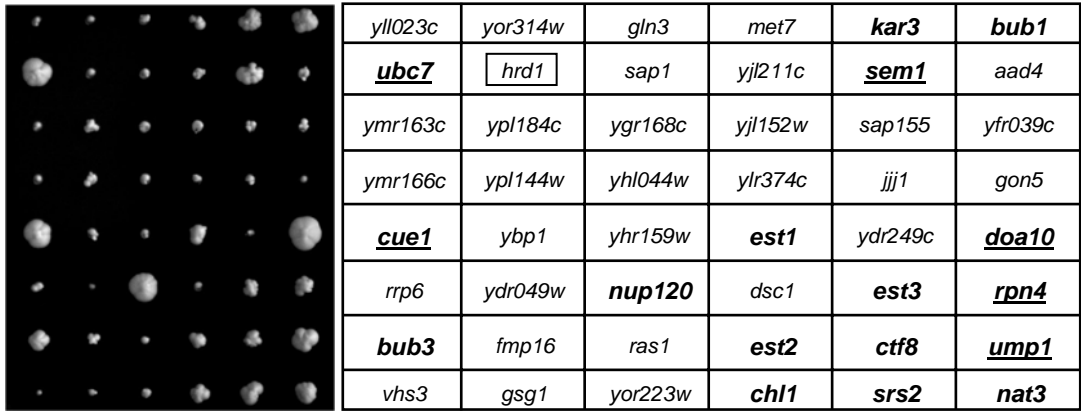

**B**

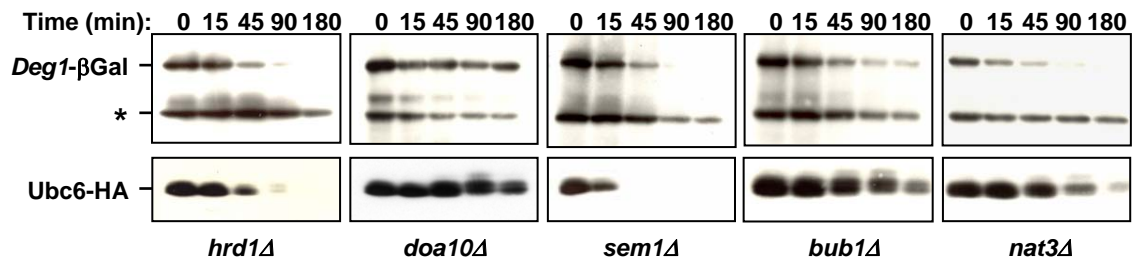

**C**

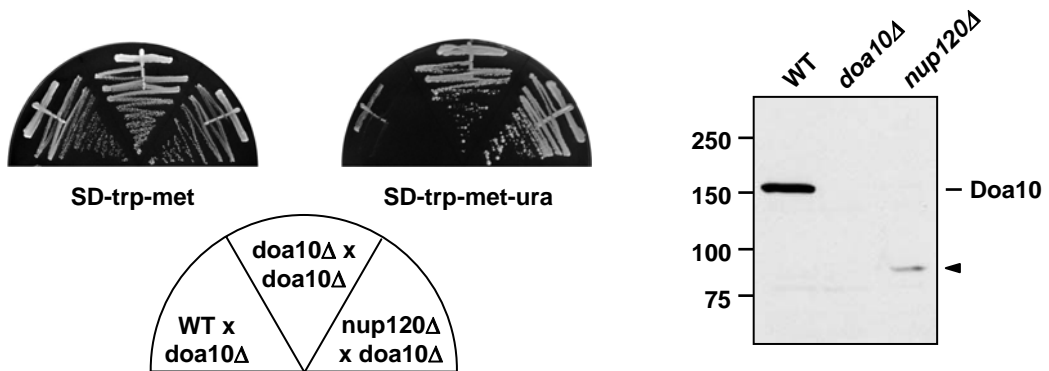

Supplementary Fig. S1. Ravid et al.

Supplement: 7600946s4.pdf [file 7600946s4.pdf]

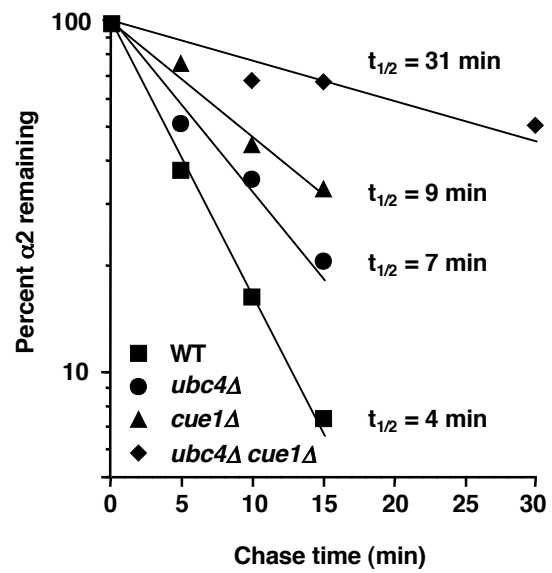

Supplementary Figure S2. Ravid et al.

Supplement: 7600946s5.pdf [file 7600946s5.pdf]

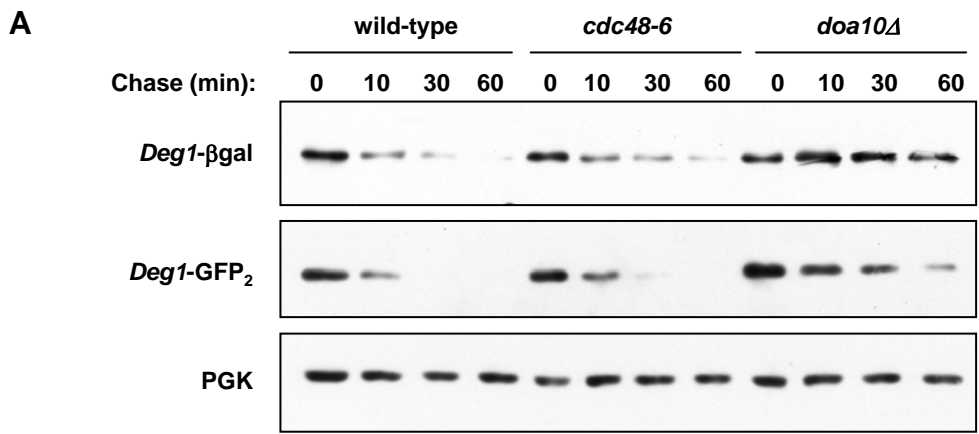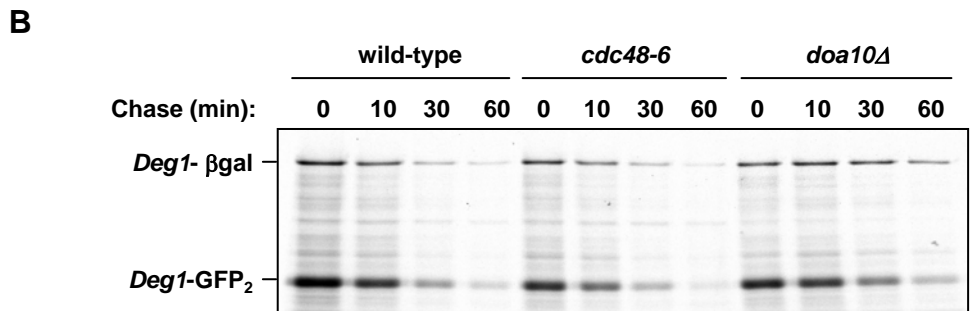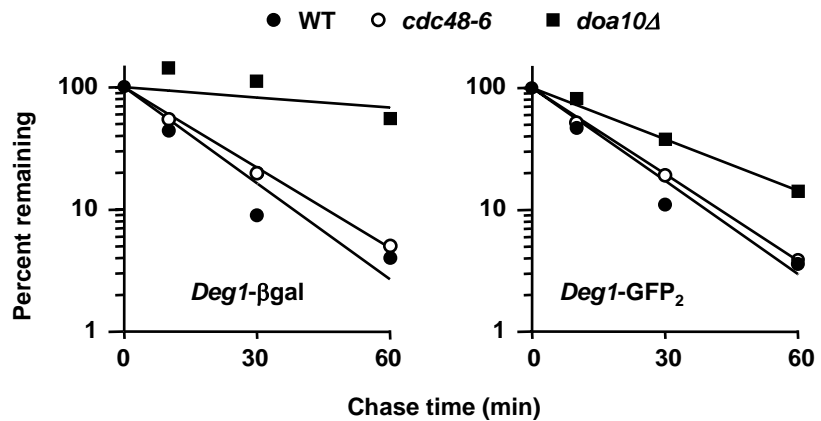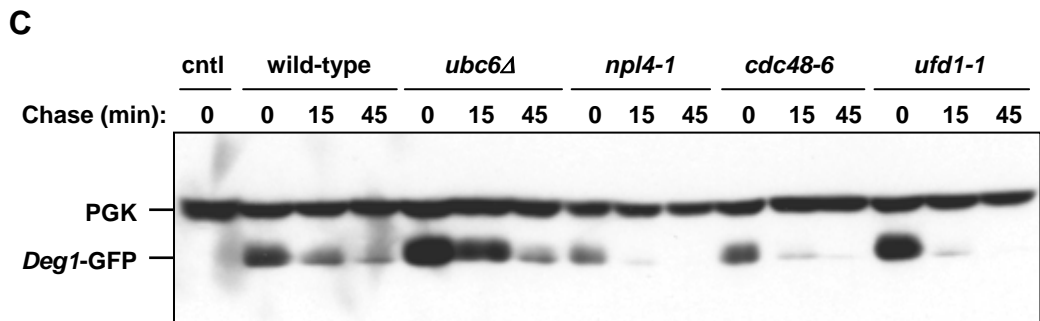

Supplement: 7600946s6.pdf [file 7600946s6.pdf]
